# Supplementary material for: Determination of the Popularity of Dietary Supplements Using Google Search Rankings
Source: PubMed Central journal article supplement (PMC7231191; doi:10.3390/nu12040908), 2020-03-26
Supplement: nutrients-12-00908-s001.pdf [file nutrients-12-00908-s001.pdf]

Supplementary file

Table S1

a) Checklist for Documentation of Google Trends research.

| <b>Section/Topic</b>                 | <b>Checklist item</b>                                                                                                                                                                                                                                                                                       |
|--------------------------------------|-------------------------------------------------------------------------------------------------------------------------------------------------------------------------------------------------------------------------------------------------------------------------------------------------------------|
| <b>Search Variables</b>              |                                                                                                                                                                                                                                                                                                             |
| Access Date                          | 17 December 2019                                                                                                                                                                                                                                                                                            |
| Time Period                          | From January 2004 to 30 November 2019                                                                                                                                                                                                                                                                       |
| Query Category                       | Health                                                                                                                                                                                                                                                                                                      |
| Region                               | Worldwide                                                                                                                                                                                                                                                                                                   |
| Countries with Low Search Volume     | Excluded                                                                                                                                                                                                                                                                                                    |
| <b>Search Input</b>                  |                                                                                                                                                                                                                                                                                                             |
| Non-adjusted                         | All n = 200 topics. The list is presented in section b).                                                                                                                                                                                                                                                    |
| Adjusted                             | Topics: "Lutein" + separately all remain topics                                                                                                                                                                                                                                                             |
| <b>Rationale for Search Strategy</b> |                                                                                                                                                                                                                                                                                                             |
| For Search Input                     | The searched topics are related to essential ingredients of dietary supplements. Because Google Trends enables to compare only five inputs at once we compared relative search volume of all topics with topic „Lutein“ (adjusted data). Therefore, we were able to compare all topics in further analysis. |
| For Setting Chosen                   | We chose the only „Health“ category to obtain only searches related to health informations. This was crucial to diminish significance of topics that may be associated with industry e.g. „Potassium“. We excluded countries with low search volume which may be sensitive for outliers                     |

b) The list of n = 200 topics related to dietary supplements and their categories. Alphabetical order.

| No | Topic                | Category           |
|----|----------------------|--------------------|
| 1  | 4-Aminobenzoic acid  | Chemical           |
| 2  | 5-Hydroxytryptophan  | Chemical           |
| 3  | Acai berry           | Botanical          |
| 4  | Acetylcarnitine      | Chemical           |
| 5  | Acetylcysteine       | Amino Acid         |
| 6  | Alanine              | Amino Acid         |
| 7  | Alfalfa              | Botanical          |
| 8  | Aloe vera            | Botanical          |
| 9  | Alpha-galactosidase  | Enzyme             |
| 10 | alpha-Linolenic acid | Fat and fatty acid |
| 11 | Amylase              | Enzyme             |
| 12 | Arginine             | Amino Acid         |
| 13 | Artichoke            | Botanical          |
| 14 | Ashwagandha          | Botanical          |
| 15 | Astaxanthin          | Chemical           |
| 16 | Barbados Cherry      | Botanical          |
| 17 | Bearberry            | Botanical          |
| 18 | Beetroot             | Botanical          |
| 19 | Bell pepper          | Botanical          |
| 20 | beta-Carotene        | Botanical          |
| 21 | Betaine              | Chemical           |
| 22 | Bilberry             | Botanical          |
| 23 | Biotin               | Vitamin            |
| 24 | Bitter orange        | Botanical          |
| 25 | Black cohosh         | Botanical          |
| 26 | Black pepper         | Botanical          |
| 27 | Blackberry           | Botanical          |

|    |                           |                    |
|----|---------------------------|--------------------|
| 28 | Blackcurrant              | Botanical          |
| 29 | Blueberry                 | Botanical          |
| 30 | Boron                     | Mineral            |
| 31 | Branched-chain amino acid | Amino Acid         |
| 32 | Broccoli                  | Botanical          |
| 33 | Bromelain                 | Enzyme             |
| 34 | Brussels sprout           | Botanical          |
| 35 | Burdock                   | Botanical          |
| 36 | Caffeine                  | Chemical           |
| 37 | Calcium                   | Mineral            |
| 38 | Carnitine                 | Amino Acid         |
| 39 | Cayenne pepper            | Botanical          |
| 40 | Centella asiatica         | Botanical          |
| 41 | Chlorella                 | Botanical          |
| 42 | Chlorophyll               | Botanical          |
| 43 | Chromium                  | Mineral            |
| 44 | Choline                   | Vitamin            |
| 45 | Chondroitin sulfate       | Chemical           |
| 46 | Cinnamon                  | Botanical          |
| 47 | Citrulline                | Amino Acid         |
| 48 | Cobalamin                 | Vitamin            |
| 49 | Common Nettle             | Botanical          |
| 50 | Coneflower                | Botanical          |
| 51 | Conjugated linoleic acid  | Fat and fatty acid |
| 52 | Copper                    | Mineral            |
| 53 | Cordyceps                 | Botanical          |
| 54 | Cranberry                 | Botanical          |
| 55 | Creatine                  | Chemical           |
| 56 | Curly kale                | Botanical          |

|    |                         |                    |
|----|-------------------------|--------------------|
| 57 | Cysteine                | Amino Acid         |
| 58 | Dandelion               | Botanical          |
| 59 | Dietary fiber           | Fiber              |
| 60 | Dimethylethanolamine    | Chemical           |
| 61 | Dipeptidyl peptidase-4  | Enzyme             |
| 62 | Docosahexaenoic acid    | Fat and fatty acid |
| 63 | Eicosapentaenoic acid   | Fat and fatty acid |
| 64 | Female ginseng          | Botanical          |
| 65 | Fennel                  | Botanical          |
| 66 | Fenugreek               | Botanical          |
| 67 | Field horsetail         | Botanical          |
| 68 | Fish oil                | Fat and fatty acid |
| 69 | Five-flavor berry       | Botanical          |
| 70 | Flavonoid               | Chemical           |
| 71 | Flax seed               | Botanical          |
| 72 | Folate                  | Vitamin            |
| 73 | Fructooligosaccharide   | Botanical          |
| 74 | gamma-Aminobutyric acid | Chemical           |
| 75 | gamma-Linolenic acid    | Fat and fatty acid |
| 76 | Garcinia cambogia       | Botanical          |
| 77 | Garlic                  | Botanical          |
| 78 | Ginger                  | Botanical          |
| 79 | Glucosamine             | Chemical           |
| 80 | Glutamic acid           | Amino Acid         |
| 81 | Glutamine               | Amino Acid         |
| 82 | Glutathione             | Chemical           |
| 83 | Glycine                 | Amino Acid         |
| 84 | Goji                    | Botanical          |
| 85 | Goldenseal              | Botanical          |

|     |                     |                    |
|-----|---------------------|--------------------|
| 86  | Grape seed extract  | Botanical          |
| 87  | Green coffee        | Botanical          |
| 88  | Green tea           | Botanical          |
| 89  | Guarana             | Botanical          |
| 90  | Hawthorn            | Botanical          |
| 91  | Hen-of-the-wood     | Botanical          |
| 92  | Hesperidin          | Botanical          |
| 93  | Histidine           | Amino Acid         |
| 94  | Holy Basil          | Botanical          |
| 95  | Hops                | Botanical          |
| 96  | Hyaluronic acid     | Chemical           |
| 97  | Indian frankincense | Botanical          |
| 98  | Indian gooseberry   | Botanical          |
| 99  | Inositol            | Vitamin            |
| 100 | Iodine              | Mineral            |
| 101 | Iron                | Mineral            |
| 102 | Isoleucine          | Amino Acid         |
| 103 | Kelp                | Botanical          |
| 104 | Lactase             | Enzyme             |
| 105 | Lecithin            | Fat and fatty acid |
| 106 | Lemon balm          | Botanical          |
| 107 | Leucine             | Amino Acid         |
| 108 | Lingzhi mushroom    | Botanical          |
| 109 | Linoleic acid       | Fat and fatty acid |
| 110 | Linseed oil         | Fat and fatty acid |
| 111 | Lipase              | Enzyme             |
| 112 | Lipoic acid         | Chemical           |
| 113 | Liquorice           | Botanical          |
| 114 | Lutein              | Vitamin            |

|     |                       |                    |
|-----|-----------------------|--------------------|
| 115 | Lycopene              | Botanical          |
| 116 | Lysine                | Amino Acid         |
| 117 | Maca                  | Botanical          |
| 118 | Magnesium             | Mineral            |
| 119 | Maidenhair tree       | Botanical          |
| 120 | Manganese             | Mineral            |
| 121 | Mangosteen            | Botanical          |
| 122 | Marsh mallow          | Botanical          |
| 123 | Melatonin             | Chemical           |
| 124 | Methionine            | Amino Acid         |
| 125 | Methylsulfonylmethane | Chemical           |
| 126 | Milk thistle          | Botanical          |
| 127 | Milkvetch             | Botanical          |
| 128 | Molybdenum            | Mineral            |
| 129 | Monounsaturated fat   | Fat and fatty acid |
| 130 | Niacin                | Vitamin            |
| 131 | Nickel                | Mineral            |
| 132 | Oat                   | Botanical          |
| 133 | Oleic acid            | Fat and fatty acid |
| 134 | Olive                 | Botanical          |
| 135 | Omega-3 fatty acids   | Fat and fatty acid |
| 136 | Omega-6 fatty acid    | Fat and fatty acid |
| 137 | Omega-9 fatty acid    | Fat and fatty acid |
| 138 | Oregano               | Botanical          |
| 139 | Pantothenic acid      | Vitamin            |
| 140 | Papain                | Botanical          |
| 141 | Papaya                | Botanical          |
| 142 | Parsley               | Botanical          |
| 143 | Passion fruit         | Botanical          |

|     |                      |                    |
|-----|----------------------|--------------------|
| 144 | Pectin               | Fiber              |
| 145 | Peppermint           | Botanical          |
| 146 | Phenylalanine        | Amino Acid         |
| 147 | Phosphatidylcholine  | Fat and fatty acid |
| 148 | Phosphatidylserine   | Fat and fatty acid |
| 149 | Phosphorus           | Mineral            |
| 150 | Polyunsaturated fat  | Fat and fatty acid |
| 151 | Pomegranate          | Botanical          |
| 152 | Potassium            | Mineral            |
| 153 | Prebiotic            | Bacterial          |
| 154 | Probiotic            | Bacterial          |
| 155 | Proline              | Amino Acid         |
| 156 | Protease             | Enzyme             |
| 157 | Protein              | Protein            |
| 158 | Quercetin            | Botanical          |
| 159 | Raspberry            | Botanical          |
| 160 | Red Clover           | Botanical          |
| 161 | Red raspberry        | Botanical          |
| 162 | Resveratrol          | Chemical           |
| 163 | Rhodiola rosea       | Botanical          |
| 164 | Riboflavin           | Vitamin            |
| 165 | Rose hip             | Botanical          |
| 166 | Rosemary             | Botanical          |
| 167 | Rutin                | Botanical          |
| 168 | Saturated fat        | Fat and fatty acid |
| 169 | Saw palmetto extract | Botanical          |
| 170 | Selenium             | Mineral            |
| 171 | Siberian Ginseng     | Botanical          |
| 172 | Silicon              | Mineral            |

|     |              |            |
|-----|--------------|------------|
| 173 | Slippery elm | Botanical  |
| 174 | Spirulina    | Botanical  |
| 175 | β-Alanine    | Amino Acid |
| 176 | Stevia       | Botanical  |
| 177 | Sucrase      | Enzyme     |
| 178 | Synbiotics   | Bacterial  |
| 179 | Taurine      | Amino Acid |
| 180 | Theanine     | Amino Acid |
| 181 | Thiamine     | Vitamin    |
| 182 | Threonine    | Amino Acid |
| 183 | Tryptophan   | Amino Acid |
| 184 | Turmeric     | Botanical  |
| 185 | Tyrosine     | Amino Acid |
| 186 | Valerian     | Botanical  |
| 187 | Valine       | Amino Acid |
| 188 | Vanadium     | Mineral    |
| 189 | Velvet bean  | Botanical  |
| 190 | Vitamin A    | Vitamin    |
| 191 | Vitamin B-6  | Vitamin    |
| 192 | Vitamin C    | Vitamin    |
| 193 | Vitamin D    | Vitamin    |
| 194 | Vitamin E    | Vitamin    |
| 195 | Vitamin K    | Vitamin    |
| 196 | Vitamin K2   | Vitamin    |
| 197 | Whey protein | Protein    |
| 198 | Yohimbe      | Botanical  |
| 199 | Zeaxanthin   | Chemical   |
| 200 | Zinc         | Mineral    |



Table S2

Use of data generated by Google Trends.

|                   | Interest over time                                                                                    | Region                                                                                 |
|-------------------|-------------------------------------------------------------------------------------------------------|----------------------------------------------------------------------------------------|
|                   |                                                                                                       | Interest by region                                                                     |
| Non-adjusted data | Time series analysis: yearly trends, seasonal variation (Table 3, Figures 2-3; Supplementary Table 5) | -                                                                                      |
|                   |                                                                                                       | Compared breakdown by region                                                           |
| Adjusted data     | Proportion of mean RSV to topic „Lutein“ (Table 1, 2; Supplementary Table 3)                          | List of the most common topics in a specific country (Figure 1, Supplementary Table 4) |

RSV – Relative Search Volume

Table S3

Popularity of of dietary supplement-related topics in proprtion to “Lutein” (adjusted data; Relative Search Volume [RSV] over time).

| No | Topic                     | Proportion of RSV to Lutein |
|----|---------------------------|-----------------------------|
| 1  | Magnesium                 | 23.72                       |
| 2  | Protein                   | 15.22                       |
| 3  | Iron                      | 15.12                       |
| 4  | Calcium                   | 13.74                       |
| 5  | Vitamin D                 | 12.22                       |
| 6  | Potassium                 | 9.71                        |
| 7  | Cobalamin                 | 9.36                        |
| 8  | Caffeine                  | 8.06                        |
| 9  | Vitamin C                 | 7.38                        |
| 10 | Omega-3 fatty acids       | 6.80                        |
| 11 | Creatine                  | 6.77                        |
| 12 | Folate                    | 6.67                        |
| 13 | Zinc                      | 6.36                        |
| 14 | Aloe vera                 | 6.11                        |
| 15 | Ginger                    | 5.91                        |
| 16 | Dietary fiber             | 5.67                        |
| 17 | Garlic                    | 5.63                        |
| 18 | Iodine                    | 4.89                        |
| 19 | Whey protein              | 4.05                        |
| 20 | Vitamin E                 | 3.86                        |
| 21 | Fish oil                  | 3.79                        |
| 22 | Turmeric                  | 3.71                        |
| 23 | Probiotic                 | 3.70                        |
| 24 | Vitamin A                 | 3.36                        |
| 25 | Glucosamine               | 3.33                        |
| 26 | Maidenhair tree           | 3.26                        |
| 27 | Green tea                 | 3.23                        |
| 28 | Carnitine                 | 3.18                        |
| 29 | Copper                    | 3.15                        |
| 30 | Maca                      | 2.85                        |
| 31 | Vitamin B-6               | 2.80                        |
| 32 | Vitamin K                 | 2.78                        |
| 33 | Methylsulfonylmethane     | 2.76                        |
| 34 | Melatonin                 | 2.70                        |
| 35 | Olive                     | 2.60                        |
| 36 | Branched-chain amino acid | 2.56                        |
| 37 | Niacin                    | 2.55                        |
| 38 | Arginine                  | 2.52                        |
| 39 | Cinnamon                  | 2.31                        |
| 40 | Spirulina                 | 2.17                        |
| 41 | Oat                       | 2.03                        |
| 42 | Acetylcysteine            | 1.98                        |
| 43 | Valerian                  | 1.97                        |
| 44 | Biotin                    | 1.89                        |
| 45 | Thiamine                  | 1.71                        |
| 46 | Glutathione               | 1.70                        |
| 47 | Fenugreek                 | 1.69                        |

|    |                          |      |
|----|--------------------------|------|
| 48 | Milk thistle             | 1.66 |
| 49 | Glutamine                | 1.63 |
| 50 | Phosphorus               | 1.59 |
| 51 | Conjugated linoleic acid | 1.56 |
| 52 | Hyaluronic acid          | 1.51 |
| 53 | Lecithin                 | 1.48 |
| 54 | Linseed oil              | 1.47 |
| 55 | Coneflower               | 1.43 |
| 56 | Selenium                 | 1.39 |
| 57 | Lysine                   | 1.37 |
| 58 | Papaya                   | 1.35 |
| 59 | Flax seed                | 1.34 |
| 60 | Saturated fat            | 1.33 |
| 61 | Parsley                  | 1.28 |
| 62 | Fennel                   | 1.27 |
| 63 | Cranberry                | 1.26 |
| 64 | Chromium                 | 1.24 |
| 65 | Rosemary                 | 1.23 |
| 66 | 5-Hydroxytryptophan      | 1.23 |
| 67 | Liquorice                | 1.22 |
| 68 | Pomegranate              | 1.22 |
| 69 | Blueberry                | 1.18 |
| 70 | Tryptophan               | 1.18 |
| 71 | gamma-Aminobutyric acid  | 1.13 |
| 72 | Amylase                  | 1.12 |
| 73 | Beetroot                 | 1.12 |
| 74 | Common Nettle            | 1.09 |
| 75 | Raspberry                | 1.08 |
| 76 | Riboflavin               | 1.05 |
| 77 | Oregano                  | 1.01 |
| 78 | Silicon                  | 1.01 |
| 79 | Lutein                   | 1.00 |
| 80 | Lemon balm               | 0.96 |
| 81 | Phenylalanine            | 0.95 |
| 82 | Artichoke                | 0.95 |
| 83 | Lipoic acid              | 0.93 |
| 84 | Lipase                   | 0.90 |
| 85 | Garcinia cambogia        | 0.87 |
| 86 | Goji                     | 0.86 |
| 87 | Peppermint               | 0.84 |
| 88 | Chondroitin sulfate      | 0.82 |
| 89 | Lingzhi mushroom         | 0.81 |
| 90 | Mangosteen               | 0.81 |
| 91 | Docosahexaenoic acid     | 0.80 |
| 92 | Tyrosine                 | 0.79 |
| 93 | Rhodiola rosea           | 0.79 |
| 94 | Dandelion                | 0.77 |
| 95 | Protease                 | 0.74 |
| 96 | Choline                  | 0.73 |
| 97 | Flavonoid                | 0.73 |
| 98 | Taurine                  | 0.73 |
| 99 | Ashwagandha              | 0.70 |

|     |                       |      |
|-----|-----------------------|------|
| 100 | Hawthorn              | 0.69 |
| 101 | Nickel                | 0.69 |
| 102 | Cayenne pepper        | 0.68 |
| 103 | Black pepper          | 0.66 |
| 104 | Pantothenic acid      | 0.65 |
| 105 | Inositol              | 0.65 |
| 106 | Saw palmetto extract  | 0.65 |
| 107 | Bell pepper           | 0.61 |
| 108 | Centella asiatica     | 0.58 |
| 109 | Stevia                | 0.55 |
| 110 | Black cohosh          | 0.54 |
| 111 | Omega-6 fatty acid    | 0.54 |
| 112 | Chlorophyll           | 0.54 |
| 113 | Passion fruit         | 0.54 |
| 114 | beta-Carotene         | 0.52 |
| 115 | Glycine               | 0.50 |
| 116 | Manganese             | 0.48 |
| 117 | Bromelain             | 0.48 |
| 118 | Chlorella             | 0.47 |
| 119 | Rose hip              | 0.45 |
| 120 | Curly kale            | 0.45 |
| 121 | Lactase               | 0.45 |
| 122 | Field horsetail       | 0.43 |
| 123 | Cysteine              | 0.42 |
| 124 | Theanine              | 0.41 |
| 125 | Guarana               | 0.41 |
| 126 | Female ginseng        | 0.40 |
| 127 | Milkvetch             | 0.40 |
| 128 | Lycopene              | 0.39 |
| 129 | Glutamic acid         | 0.39 |
| 130 | Eicosapentaenoic acid | 0.38 |
| 131 | Resveratrol           | 0.38 |
| 132 | Cordyceps             | 0.38 |
| 133 | Boron                 | 0.38 |
| 134 | Grape seed extract    | 0.37 |
| 135 | Linoleic acid         | 0.37 |
| 136 | Quercetin             | 0.37 |
| 137 | Astaxanthin           | 0.37 |
| 138 | Phosphatidylcholine   | 0.37 |
| 139 | Goldenseal            | 0.35 |
| 140 | Alfalfa               | 0.34 |
| 141 | Pectin                | 0.34 |
| 142 | Acai berry            | 0.33 |
| 143 | Citrulline            | 0.32 |
| 144 | Acetylcarnitine       | 0.32 |
| 145 | Burdock               | 0.32 |
| 146 | Methionine            | 0.32 |
| 147 | Polyunsaturated fat   | 0.31 |
| 148 | Kelp                  | 0.31 |
| 149 | Blackberry            | 0.30 |
| 150 | Holy Basil            | 0.30 |
| 151 | Prebiotic             | 0.30 |

|     |                        |      |
|-----|------------------------|------|
| 152 | Siberian Ginseng       | 0.30 |
| 153 | Monounsaturated fat    | 0.29 |
| 154 | Phosphatidylserine     | 0.29 |
| 155 | Bilberry               | 0.28 |
| 156 | Leucine                | 0.28 |
| 157 | Vitamin K2             | 0.27 |
| 158 | Oleic acid             | 0.27 |
| 159 | Five-flavor berry      | 0.27 |
| 160 | Red Clover             | 0.26 |
| 161 | β-Alanine              | 0.26 |
| 162 | Blackcurrant           | 0.26 |
| 163 | Red raspberry          | 0.25 |
| 164 | Betaine                | 0.24 |
| 165 | Indian gooseberry      | 0.22 |
| 166 | Rutin                  | 0.21 |
| 167 | 4-Aminobenzoic acid    | 0.21 |
| 168 | Molybdenum             | 0.21 |
| 169 | Velvet bean            | 0.21 |
| 170 | Broccoli               | 0.20 |
| 171 | Papain                 | 0.19 |
| 172 | Slippery elm           | 0.19 |
| 173 | Alanine                | 0.18 |
| 174 | alpha-Linolenic acid   | 0.18 |
| 175 | Brussels sprout        | 0.18 |
| 176 | Histidine              | 0.17 |
| 177 | Bearberry              | 0.17 |
| 178 | Bitter orange          | 0.16 |
| 179 | Barbados Cherry        | 0.15 |
| 180 | Proline                | 0.14 |
| 181 | Marsh mallow           | 0.14 |
| 182 | Hen-of-the-wood        | 0.13 |
| 183 | Valine                 | 0.13 |
| 184 | Hesperidin             | 0.12 |
| 185 | Dimethylethanolamine   | 0.11 |
| 186 | Hops                   | 0.11 |
| 187 | Dipeptidyl peptidase-4 | 0.11 |
| 188 | Zeaxanthin             | 0.10 |
| 189 | Green coffee           | 0.10 |
| 190 | Omega-9 fatty acid     | 0.10 |
| 191 | Vanadium               | 0.09 |
| 192 | Indian frankincense    | 0.09 |
| 193 | Isoleucine             | 0.09 |
| 194 | Fructooligosaccharide  | 0.09 |
| 195 | gamma-Linolenic acid   | 0.08 |
| 196 | Yohimbe                | 0.08 |
| 197 | Threonine              | 0.06 |
| 198 | Sucrase                | 0.03 |
| 199 | Synbiotics             | 0.03 |
| 200 | Alpha-galactosidase    | 0.02 |

Table S4

The ten most common dietary supplements-related topics in a specific country.

Relative search volume estimated by using adjusted data showing the breakdown by region (Lutein + another dietary supplements-related topic).

| Country              | The most common topic                                                                                                                                                             |
|----------------------|-----------------------------------------------------------------------------------------------------------------------------------------------------------------------------------|
| Afghanistan          | Bitter orange (100), Lutein (50)                                                                                                                                                  |
| Albania              | Boron (100), Iodine (100), Selenium (100), Silicon (100), Lutein (50)                                                                                                             |
| Angola               | Passion fruit (100), Yohimbe (100), Lutein (50)                                                                                                                                   |
| Argentina            | Magnesium (100), Calcium (99), Cobalamin (99), Ginger (99), Iron (99), Maca (99), Potassium (99), Creatine (98), Vitamin D (98), Aloe vera (97)                                   |
| Armenia              | Burdock (100), Dandelion (100), Glycine (100), Hawthorn (100), Hops (100), Liponic acid (100), Molybdenum (100), Taurine (100), Vitamin B-6 (100), Lutein (50)                    |
| Australia            | Protein (99), Iron (98), Magnesium (98), Vitamin D (97), Caffeine (96), Calcium (96), Cobalamin (95), Vitamin C (95), Fish oil (93), Potassium (93)                               |
| Austria              | Magnesium (99), Vitamin D (97), Cobalamin (95), Iron (94), Calcium (93), Folate (92), Omega-3 fatty acids (92), Potassium (92), Zinc (92), Vitamin C (91)                         |
| Bahrain              | Fennel (100), Fenugreek (100), Olive (100), Parsley (100), Pomegranate (100), Lutein (50)                                                                                         |
| Barbados             | Cayenne pepper (100), Lutein (50)                                                                                                                                                 |
| Belarus              | Magnesium (94), Vitamin B-6 (91), Calcium (88), Vitamin D (88), Folate (87), Iron (87), Glycine (85), Ginger (84), Omega-3 fatty acids (84), Vitamin E (84)                       |
| Belgium              | Magnesium (100), Vitamin D (99), Cobalamin (98), Iron (98), Folate (97), Calcium (96), Omega-3 fatty acids (96), Potassium (96), Aloe vera (95), Creatine (95)                    |
| Bhutan               | Cordyceps (100), Lutein (50)                                                                                                                                                      |
| Bosnia & Herzegovina | Amylase (100), Artichoke (100), Astaxanthin (100), beta-Carotene (100), Black pepper (100), Carnitine (100), Chromium (100), Cinnamon (100), Common Nettle (100), Cranberry (100) |
| Brazil               | Magnesium (99), Whey protein (97), Ginger (96), Vitamin D (96), Branched-chain amino acid (95), Calcium (95), Creatine (95), Copper (94), Iron (94), Oat (94)                     |
| Brunei               | Alfalfa (100), Mangosteen (100), Lutein (50)                                                                                                                                      |
| Bulgaria             | Magnesium (97), Carnitine (91), Vitamin D (91), Aloe vera (90), Cobalamin (88), Creatine (88), Probiotic (88), Selenium (87), Omega-3 fatty acids (86), Calcium (85)              |
| Cambodia             | Mangosteen (100), Lutein (50)                                                                                                                                                     |
| Cameroon             | Glutathione (100), Parsley (100), Lutein (50)                                                                                                                                     |
| Canada               | Protein (98), Magnesium (97), Iron (96), Caffeine (95), Calcium (95), Cobalamin (95), Vitamin D (95), Omega-3 fatty acids (92), Potassium (92), Vitamin C (91)                    |
| Chile                | Magnesium (100), Calcium (99), Ginger (99), Iron (99), Omega-3 fatty acids (99), Potassium (99), Spirulina (99), Vitamin D (99), Aloe vera (98), Cobalamin (98)                   |
| China                | Calcium (98), Iron (93), Zinc (93), Vitamin C (92), Potassium (91), Iodine (90), Maidenhair tree (90), Vitamin E (90), Ginger (89), Spirulina (89)                                |
| Colombia             | Magnesium (99), Aloe vera (98), Calcium (98), Ginger (98), Potassium (98), Iron (97), Methylsulfonylmethane (97), Thiamine (97), Vitamin C (97), Cobalamin (96)                   |
| Côte d'Ivoire        | Glutathione (100), Lutein (50)                                                                                                                                                    |
| Croatia              | Iron (99), Magnesium (99), Ginger (97), Garlic (96), Maca (96), Olive (96), Potassium (96), Probiotic (96), Vitamin C (96), Vitamin D (96)                                        |
| Cuba                 | Chondroitin sulfate (100), Lutein (50)                                                                                                                                            |
| Czechia              | Magnesium (96), Iron (91), Calcium (89), Vitamin C (89), Garlic (88), Ginger (88), Vitamin D (88), Milk thistle (87), Potassium (87), Branched-chain amino acid (85)              |
| Denmark              | Magnesium (99), Vitamin D (99), Cobalamin (97), Ginger (97), Calcium (96), Fish oil (96), Iron (96), Potassium (96), Aloe vera (95), Creatine (95)                                |

|            |                                                                                                                                                                                               |
|------------|-----------------------------------------------------------------------------------------------------------------------------------------------------------------------------------------------|
| Egypt      | Calcium (99), Ginger (99), Iron (99), Vitamin D (99), Cinnamon (98), Cobalamin (98), Fenugreek (98), Garlic (98), Magnesium (98), Olive (98)                                                  |
| Finland    | Magnesium (100), Iron (99), Vitamin D (99), Calcium (98), Cobalamin (98), Melatonin (98), Zinc (98), Methylsulfonylmethane (97), Omega-3 fatty acids (97), Potassium (97)                     |
| France     | Iron (99), Magnesium (99), Vitamin D (98), Aloe vera (97), Copper (97), Ginger (97), Potassium (97), Calcium (96), Folate (96), Probiotic (96)                                                |
| Germany    | Magnesium (99), Vitamin D (97), Cobalamin (96), Iron (94), Calcium (92), Potassium (92), Folate (91), Zinc (91), Omega-3 fatty acids (90), Maidenhair tree (87)                               |
| Ghana      | Aloe vera (100), Beetroot (100), Bell pepper (100), Black pepper (100), Cayenne pepper (100), Centella asiatica (100), Cinnamon (100), Cordyceps (100), Dandelion (100), Female ginseng (100) |
| Greece     | Magnesium (99), Aloe vera (98), Iron (98), Vitamin D (98), Cobalamin (96), Omega-3 fatty acids (96), Protein (96), Calcium (95), Creatine (95), Folate (95)                                   |
| Honduras   | Aloe vera (100), Bitter orange (100), Conjugated linoleic acid (100), Field horsetail (100), Flax seed (100), Hesperidin (100), Isoleucine (100), Lecithin (100), Oregano (100), Papaya (100) |
| Hong Kong  | Calcium (91), Vitamin C (87), Potassium (85), Probiotic (83), Protein (83), Iron (82), Glucosamine (80), Folate (79), Vitamin D (79), Ginger (78)                                             |
| Hungary    | Magnesium (99), Vitamin D (92), Calcium (91), Vitamin B-6 (91), Iron (90), Aloe vera (87), Garlic (87), Potassium (87), Omega-3 fatty acids (86), Creatine (85)                               |
| Iceland    | Astaxanthin (100), Lutein (50)                                                                                                                                                                |
| India      | Protein (100), Calcium (98), Magnesium (98), Vitamin D (98), Aloe vera (97), Cobalamin (97), Iron (97), Whey protein (97), Folate (96), Potassium (96)                                        |
| Indonesia  | Garlic (99), Ginger (99), Magnesium (99), Papaya (99), Aloe vera (97), Calcium (97), Mangosteen (97), Green tea (96), Olive (96), Vitamin C (96)                                              |
| Iran       | Calcium (100), Fennel (100), Garlic (100), Iron (100), Vitamin D (100), Zinc (100), Cinnamon (99), Creatine (99), Flax seed (99), Folate (99)                                                 |
| Ireland    | Protein (98), Magnesium (97), Iron (96), Vitamin D (96), Cobalamin (95), Calcium (94), Caffeine (92), Aloe vera (91), Creatine (91), Vitamin C (91)                                           |
| Israel     | Iron (99), Cobalamin (98), Magnesium (98), Vitamin D (98), Calcium (97), Omega-3 fatty acids (97), Folate (96), Potassium (96), Probiotic (95), Garlic (94)                                   |
| Italy      | Magnesium (99), Aloe vera (95), Iron (95), Vitamin D (95), Ginger (94), Potassium (94), Cobalamin (92), Folate (92), Omega-3 fatty acids (91), Acetylcysteine (90)                            |
| Japan      | Iron (90), Folate (86), Zinc (86), Potassium (84), Calcium (82), Vitamin C (82), Caffeine (77), Dietary fiber (77), Garlic (77), Magnesium (77)                                               |
| Kazakhstan | Magnesium (95), Calcium (94), Vitamin B-6 (93), Aloe vera (92), Folate (91), Vitamin D (91), Ginger (90), Vitamin E (90), Iron (89), Acetylcysteine (87)                                      |
| Kenya      | Aloe vera (100), Ashwagandha (100), Beetroot (100), Bell pepper (100), beta-Carotene (100), Black pepper (100), Calcium (100), Cayenne pepper (100), Chlorophyll (100), Cinnamon (100)        |
| Kosovo     | Iodine (100), Maca (100), Selenium (100), Silicon (100), Lutein (50)                                                                                                                          |
| Libya      | Cinnamon (100), Fennel (100), Fenugreek (100), Ginger (100), Olive (100), Parsley (100), Pomegranate (100), Rosemary (100), Vitamin D (100), Lutein (50)                                      |
| Lithuania  | Magnesium (99), Iron (96), Vitamin D (95), Potassium (94), Calcium (93), Vitamin C (91), Creatine (90), Garlic (90), Folate (89), Ginger (89)                                                 |
| Malaysia   | Vitamin C (95), Protein (93), Calcium (91), Garlic (91), Aloe vera (89), Magnesium (89), Fish oil (87), Folate (87), Iron (87), Ginger (85)                                                   |
| Mauritius  | Holy Basil (100), Lutein (50)                                                                                                                                                                 |
| Mexico     | Magnesium (99), Calcium (98), Aloe vera (97), Iron (97), Potassium (97), Carnitine (96), Garlic (96), Ginger (96), Folate (95), Omega-3 fatty acids (95)                                      |
| Montenegro | Goji (100), Hops (100), Marsh mallow (100), Red raspberry (100), Selenium (100), Silicon (100), Lutein (50)                                                                                   |

|                 |                                                                                                                                                                                               |
|-----------------|-----------------------------------------------------------------------------------------------------------------------------------------------------------------------------------------------|
| Mozambique      | Yohimbe (100), Lutein (50)                                                                                                                                                                    |
| Myanmar (Burma) | Mangosteen (100), Velvet bean (100), Lutein (50)                                                                                                                                              |
| Nepal           | Ashwagandha (100), Cordyceps (100), Holy Basil (100), Indian gooseberry (100), Lutein (50)                                                                                                    |
| Netherlands     | Cobalamin (99), Magnesium (99), Vitamin D (99), Melatonin (97), Calcium (96), Folate (96), Potassium (96), Vitamin C (96), Creatine (95), Iron (95)                                           |
| New Zealand     | Protein (99), Iron (97), Magnesium (97), Vitamin C (96), Caffeine (95), Calcium (95), Cobalamin (95), Vitamin D (95), Potassium (93), Zinc (92)                                               |
| Nicaragua       | Bitter orange (100), Field horsetail (100), Flax seed (100), Glutamic acid (100), Hesperidin (100), Lecithin (100), Papaya (100), Phosphorus (100), Lutein (50)                               |
| North Macedonia | Barbados Cherry (100), beta-Carotene (100), Common Nettle (100), Iodine (100), Maca (100), Marsh mallow (100), Oregano (100), Selenium (100), Silicon (100), Spirulina (100)                  |
| Norway          | Vitamin D (99), Cobalamin (98), Iron (98), Magnesium (98), Calcium (97), Creatine (97), Ginger (97), Omega-3 fatty acids (97), Caffeine (96), Folate (96)                                     |
| Pakistan        | Protein (99), Vitamin D (99), Calcium (98), Magnesium (98), Iron (97), Aloe vera (96), Folate (96), Cobalamin (95), Potassium (95), Vitamin C (95)                                            |
| Palestine       | Cinnamon (100), Fennel (100), Fenugreek (100), Hawthorn (100), Olive (100), Parsley (100), Pomegranate (100), Rosemary (100), Lutein (50)                                                     |
| Paraguay        | Amylase (100), Barbados Cherry (100), Betaine (100), Bitter orange (100), Citrulline (100), Conjugated linoleic acid (100), Copper (100), Creatine (100), Field horsetail (100), Garlic (100) |
| Peru            | Magnesium (99), Calcium (98), Iron (98), Aloe vera (97), Maca (97), Methylsulfonylmethane (97), Potassium (97), Vitamin C (97), Cobalamin (96), Folate (95)                                   |
| Philippines     | Glutathione (97), Protein (97), Vitamin C (97), Calcium (95), Iodine (95), Iron (95), Magnesium (95), Potassium (94), Vitamin E (94), Turmeric (93)                                           |
| Poland          | Magnesium (84), Iron (72), Vitamin D (72), Calcium (67), Creatine (67), Potassium (67), Cobalamin (59), Garlic (58), Vitamin B-6 (53), Dietary fiber (51)                                     |
| Portugal        | Magnesium (100), Ginger (98), Oat (98), Iron (97), Vitamin D (97), Calcium (96), Cobalamin (96), Potassium (96), Cinnamon (94), Creatine (94)                                                 |
| Réunion         | Barbados Cherry (100), Betaine (100), Lutein (50)                                                                                                                                             |
| Romania         | Magnesium (98), Calcium (94), Iron (91), Vitamin C (90), Omega-3 fatty acids (89), Vitamin D (88), Vitamin B-6 (87), Copper (85), Folate (84), Aloe vera (82)                                 |
| Russia          | Magnesium (94), Vitamin B-6 (93), Calcium (91), Carnitine (91), Vitamin D (91), Iron (90), Folate (89), Vitamin E (89), Glycine (88), Ginger (87)                                             |
| Saudi Arabia    | Vitamin D (100), Fenugreek (99), Ginger (99), Iron (99), Calcium (98), Cinnamon (98), Garlic (98), Magnesium (98), Olive (98), Pomegranate (98)                                               |
| Senegal         | Glutathione (100), Lutein (50)                                                                                                                                                                |
| Serbia          | Magnesium (99), Iron (98), Selenium (98), Ginger (97), Iodine (97), Garlic (96), Probiotic (96), Vitamin C (96), Vitamin D (96), Zinc (96)                                                    |
| Singapore       | Protein (94), Calcium (89), Vitamin C (88), Iron (86), Magnesium (85), Potassium (84), Caffeine (83), Vitamin D (83), Fish oil (82), Omega-3 fatty acids (82)                                 |
| Slovakia        | Magnesium (98), Iron (93), Calcium (92), Vitamin C (91), Creatine (90), Vitamin D (90), Probiotic (89), Aloe vera (88), Vitamin B-6 (87), Zinc (87)                                           |
| South Africa    | Aloe vera (99), Iron (99), Magnesium (99), Protein (99), Calcium (98), Folate (98), Ginger (98), Vitamin C (98), Vitamin D (98), Caffeine (97)                                                |
| South Korea     | Calcium (87), Vitamin C (87), Omega-3 fatty acids (85), Vitamin D (84), Magnesium (82), Potassium (77), Five-flavor berry (75), Iron (75), Zinc (75), Caffeine (73)                           |
| Spain           | Magnesium (99), Iron (98), Calcium (97), Cobalamin (97), Potassium (97), Vitamin D (97), Maca (96), Ginger (95), Omega-3 fatty acids (95), Vitamin C (95)                                     |
| Sri Lanka       | 4-Aminobenzoic acid (100), alpha-Linolenic acid (100), Amylase (100), Ashwagandha (100), Centella asiatica (100), Fenugreek (100), Fish oil (100), Glutathione (100), Histidine               |



|                      |                                                                                                                                                                                         |
|----------------------|-----------------------------------------------------------------------------------------------------------------------------------------------------------------------------------------|
|                      | (100), Indian gooseberry (100)                                                                                                                                                          |
| Sudan                | Cinnamon (100), Fennel (100), Fenugreek (100), Garlic (100), Ginger (100), Olive (100), Parsley (100), Pomegranate (100), Lutein (50)                                                   |
| Sweden               | Magnesium (99), Vitamin D (98), Cobalamin (97), Omega-3 fatty acids (97), Iron (96), Calcium (95), Creatine (95), Folate (95), Potassium (95), Vitamin C (95)                           |
| Switzerland          | Magnesium (99), Cobalamin (97), Vitamin D (97), Iron (96), Calcium (93), Omega-3 fatty acids (93), Potassium (93), Folate (92), Ginger (91), Zinc (91)                                  |
| Syria                | Bitter orange (100), Cinnamon (100), Common Nettle (100), Fennel (100), Fenugreek (100), Flax seed (100), Garlic (100), Ginger (100), Hawthorn (100), Lemon balm (100)                  |
| Taiwan               | Calcium (62), Probiotic (58), Lutein (50), Fish oil (46), Vitamin C (45), Iron (42), Potassium (39), Turmeric (39), Vitamin D (33), Folate (32)                                         |
| Tanzania             | Nickel (100), Lutein (50)                                                                                                                                                               |
| Thailand             | Glutathione (98), Vitamin C (98), Aloe vera (95), Turmeric (94), Calcium (93), Iron (93), Ginger (89), Vitamin D (88), Magnesium (85), Garlic (84)                                      |
| Tunisia              | Aloe vera (100), Artichoke (100), Barbados Cherry (100), Bearberry (100), Burdock (100), Carnitine (100), Cinnamon (100), Conjugated linoleic acid (100), Fennel (100), Fenugreek (100) |
| Turkey               | Magnesium (100), Cobalamin (99), Garlic (99), Ginger (99), Iron (99), Vitamin D (99), Cinnamon (98), Parsley (98), Calcium (97), Fish oil (97)                                          |
| Turkmenistan         | Glycine (100), Lutein (50)                                                                                                                                                              |
| Uganda               | Beetroot (100), Lutein (50)                                                                                                                                                             |
| Ukraine              | Magnesium (93), Calcium (90), Vitamin B-6 (90), Vitamin E (85), Vitamin D (84), Ginger (83), Acetylcysteine (82), Iodine (82), Creatine (81), Folate (81)                               |
| United Arab Emirates | Protein (98), Vitamin D (98), Iron (97), Magnesium (97), Calcium (96), Ginger (96), Vitamin C (95), Cobalamin (94), Fenugreek (94), Garlic (94)                                         |
| United Kingdom       | Protein (99), Vitamin D (98), Cobalamin (97), Iron (97), Caffeine (96), Calcium (96), Magnesium (96), Aloe vera (94), Creatine (93), Folate (93)                                        |
| United States        | Protein (99), Magnesium (98), Caffeine (97), Vitamin D (97), Calcium (96), Iron (96), Cobalamin (95), Potassium (95), Dietary fiber (94), Probiotic (92)                                |
| Venezuela            | Magnesium (99), Potassium (99), Aloe vera (98), Calcium (97), Folate (96), Carnitine (95), Cobalamin (95), Creatine (95), Iron (95), Methylsulfonylmethane (95)                         |
| Vietnam              | Calcium (100), Iron (100), Garlic (99), Zinc (99), Cinnamon (98), Copper (98), Ginger (98), Magnesium (98), Turmeric (98), Vitamin E (97)                                               |
| Yemen                | Fennel (100), Fenugreek (100), Garlic (100), Olive (100), Pomegranate (100), Lutein (50)                                                                                                |
| Zimbabwe             | Cayenne pepper (100), Lutein (50)                                                                                                                                                       |

Table S5

Time series analysis of n = 200 topics related to dietary supplements.

| Topic                | Seasonal Mann-Kendall test | Slope [RSV/year] | TBATS (seasonality present, period [month]) | Month with the highest seasonal component [RSV] | Month with the lowest seasonal component [RSV] | Seasonal component amplitude [RSV] |
|----------------------|----------------------------|------------------|---------------------------------------------|-------------------------------------------------|------------------------------------------------|------------------------------------|
| 4-Aminobenzoic acid  | tau = -0.84; ***           | -3.37; ***       | YES, 12                                     | April (7.06)                                    | December (-10.15)                              | 17.21                              |
| 5-Hydroxytryptophan  | tau = -0.28; ***           | -0.90; ***       | YES, 12                                     | August (3.99)                                   | December (-7.19)                               | 11.18                              |
| Acai berry           | tau = 0.01; 0.803          | -                | YES, 12                                     | January (4.56)                                  | June (-2.78)                                   | 7.34                               |
| Acetylcarnitine      | tau = 0.07; 0.196          | -                | YES, 12                                     | March (4.01)                                    | December (-7.81)                               | 11.83                              |
| Acetylcysteine       | tau = 0.93; ***            | 3.45; ***        | YES, 12                                     | January (8.94)                                  | August (-8.54)                                 | 17.48                              |
| Alanine              | tau = -0.49; ***           | -1.36; ***       | YES, 12                                     | April (7.76)                                    | August (-10.65)                                | 18.41                              |
| Alfalfa              | tau = 0.46; ***            | 1.57; ***        | YES, 12                                     | April (7.13)                                    | December (-8.44)                               | 15.57                              |
| Aloe vera            | tau = 0.75; ***            | 3.48; ***        | YES, 12                                     | July (4.58)                                     | December (-8.81)                               | 13.39                              |
| Alpha-galactosidase  | tau = -0.21; ***           | -0.81; ***       | NO, -                                       | -                                               | -                                              | -                                  |
| alpha-Linolenic acid | tau = -0.76; ***           | -2.54; ***       | YES, 12                                     | March (5.18)                                    | August (-5.49)                                 | 10.67                              |
| Amylase              | tau = 0.06; 0.286          | -                | YES, 12                                     | November (9.46)                                 | July (-15.76)                                  | 25.23                              |
| Arginine             | tau = 0.18; **             | 0.27; **         | YES, 12                                     | February (5.31)                                 | December (-7.91)                               | 13.21                              |
| Artichoke            | tau = 0.44; ***            | 2.11; ***        | YES, 12                                     | April (14.49)                                   | December (-13.09)                              | 27.58                              |
| Ashwagandha          | tau = 0.82; ***            | 4.25; ***        | YES, 12                                     | March (1.54)                                    | December (-2.78)                               | 4.32                               |
| Astaxanthin          | tau = 0.70; ***            | 4.41; ***        | YES, 12                                     | June (4.06)                                     | December (-7.63)                               | 11.69                              |
| Barbados Cherry      | tau = 0.73; ***            | 2.40; ***        | YES, 12                                     | February (9.94)                                 | July (-8.49)                                   | 18.42                              |
| Bearberry            | tau = -0.37; ***           | -0.97; ***       | YES, 12                                     | August (4.00)                                   | December (-4.27)                               | 8.27                               |
| Beetroot             | tau = 0.94; ***            | 5.42; ***        | YES, 12                                     | January (4.52)                                  | December (-7.38)                               | 11.91                              |
| Bell pepper          | tau = 0.95; ***            | 4.69; ***        | YES, 12                                     | August (6.24)                                   | December (-16.16)                              | 22.40                              |
| beta-Carotene        | tau = -0.82; ***           | -2.36; ***       | YES, 12                                     | May (7.95)                                      | December (-7.69)                               | 15.65                              |
| Betaine              | tau = 0.42; ***            | 1.49; ***        | NO, -                                       | -                                               | -                                              | -                                  |
| Bilberry             | tau = -0.21; ***           | -0.98; ***       | YES, 12                                     | July (8.16)                                     | December (-7.36)                               | 15.53                              |
| Biotin               | tau = 0.27; ***            | 0.94; ***        | YES, 12                                     | February (1.98)                                 | December (-5.52)                               | 7.50                               |
| Bitter orange        | tau = 0.35; ***            | 0.77; ***        | YES, 12                                     | January (7.00)                                  | September (-6.48)                              | 13.48                              |
| Black cohosh         | tau = -0.75; ***           | -2.59; ***       | YES, 12                                     | August (5.86)                                   | December (-10.92)                              | 16.78                              |
| Black pepper         | tau = 0.95; ***            | 3.09; ***        | YES, 12                                     | May (1.86)                                      | June (-2.75)                                   | 4.61                               |
| Blackberry           | tau = 0.89; ***            | 4.26; ***        | YES, 12                                     | August (14.84)                                  | December (-10.93)                              | 25.76                              |

|                           |                    |              |         |                 |                   |       |
|---------------------------|--------------------|--------------|---------|-----------------|-------------------|-------|
| Blackcurrant              | tau = 0.68; ***    | 1.59; ***    | YES, 12 | July (12.25)    | December (-7.12)  | 19.36 |
| Blueberry                 | tau = 0.79; ***    | 2.32; ***    | YES, 12 | July (24.11)    | December (-16.49) | 40.59 |
| Boron                     | tau = 0.63; ***    | 2.32; ***    | YES, 12 | July (4.31)     | December (-6.49)  | 10.80 |
| Branched-chain amino acid | tau = 0.86; ***    | 5.45; ***    | YES, 12 | March (3.65)    | December (-9.51)  | 13.16 |
| Broccoli                  | tau = 0.84; ***    | 3.38; ***    | YES, 12 | January (12.22) | December (-9.96)  | 22.19 |
| Bromelain                 | tau = 0.13; 0.016  | 0.21; 0.234  | YES, 12 | February (5.87) | December (-7.72)  | 13.59 |
| Brussels sprout           | tau = 0.92; ***    | 3.81; ***    | YES, 12 | January (16.59) | August (-12.19)   | 28.78 |
| Burdock                   | tau = 0.64; ***    | 1.97; ***    | YES, 12 | May (11.19)     | December (-6.84)  | 18.03 |
| Caffeine                  | tau = 0.48; ***    | 1.21; ***    | YES, 12 | October (4.93)  | December (-6.40)  | 11.33 |
| Calcium                   | tau = 0.16; **     | 0.41; **     | YES, 12 | April (4.91)    | December (-10.41) | 15.32 |
| Carnitine                 | tau = -0.08; 0.159 | -            | YES, 12 | April (8.82)    | December (-17.64) | 26.46 |
| Cayenne pepper            | tau = 0.40; ***    | 1.78; ***    | YES, 12 | January (13.26) | December (-7.95)  | 21.21 |
| Centella asiatica         | tau = 0.50; ***    | 0.88; ***    | YES, 12 | August (5.28)   | December (-9.29)  | 14.57 |
| Chlorella                 | tau = 0.16; **     | -0.19; 0.265 | YES, 12 | March (4.15)    | December (-9.23)  | 13.38 |
| Chlorophyll               | tau = 0.69; ***    | 3.07; ***    | YES, 12 | March (5.31)    | December (-6.91)  | 12.22 |
| Choline                   | tau = -0.30; ***   | -1.20; ***   | YES, 12 | April (2.19)    | December (-4.40)  | 6.59  |
| Chondroitin sulfate       | tau = -0.02; 0.772 | -            | YES, 12 | March (3.16)    | December (-7.07)  | 10.23 |
| Chromium                  | tau = -0.59; ***   | -0.40; **    | YES, 12 | April (6.57)    | December (-2.93)  | 9.49  |
| Cinnamon                  | tau = 0.90; ***    | 5.42; ***    | YES, 12 | January (6.59)  | June (-5.98)      | 12.56 |
| Citrulline                | tau = 0.80; ***    | 4.55; ***    | YES, 12 | July (4.31)     | December (-6.52)  | 10.83 |
| Cobalamin                 | tau = 0.94; ***    | 3.12; ***    | YES, 12 | March (2.77)    | December (-7.21)  | 9.98  |
| Common Nettle             | tau = 0.65; ***    | 1.34; ***    | YES, 12 | May (19.97)     | December (-17.02) | 36.99 |
| Coneflower                | tau = -0.12; 0.03  | -0.57; **    | YES, 12 | October (13.01) | June (-11.57)     | 24.59 |
| Conjugated linoleic acid  | tau = -0.44; ***   | -1.57; ***   | YES, 12 | May (6.00)      | December (-14.66) | 20.66 |
| Copper                    | tau = 0.86; ***    | 2.92; ***    | YES, 12 | October (4.12)  | December (-6.49)  | 10.61 |
| Cordyceps                 | tau = 0.59; ***    | 1.66; ***    | NO, -   | -               | -                 | -     |
| Cranberry                 | tau = 0.91; ***    | 3.11; ***    | YES, 12 | November (9.89) | June (-7.72)      | 17.61 |
| Creatine                  | tau = -0.64; ***   | -1.57; ***   | YES, 12 | February (5.72) | December (-11.08) | 16.80 |
| Curly kale                | tau = 0.63; ***    | 4.58; ***    | YES, 12 | January (9.53)  | December (-5.97)  | 15.49 |
| Cysteine                  | tau = -0.51; ***   | -1.87; ***   | YES, 12 | October (4.99)  | December (-4.12)  | 9.11  |
| Dandelion                 | tau = 0.70; ***    | 2.22; ***    | YES, 12 | May (25.02)     | December (-12.15) | 37.17 |
| Dietary fiber             | tau = 0.55; ***    | 1.14; ***    | YES, 12 | March (7.98)    | December (-15.17) | 23.15 |
| Dimethylethanolamine      | tau = -0.71; ***   | -2.45; ***   | YES, 12 | February (2.81) | December (-6.09)  | 8.89  |
| Dipeptidyl peptidase-4    | tau = 0.49; ***    | 0.89; ***    | NO, -   | -               | -                 | -     |

|                         |                    |             |         |                   |                   |       |
|-------------------------|--------------------|-------------|---------|-------------------|-------------------|-------|
| Docosahexaenoic acid    | tau = 0.79; ***    | 2.74; ***   | YES, 12 | October (3.31)    | December (-7.24)  | 10.55 |
| Eicosapentaenoic acid   | tau = 0.13; 0.017  | 0.21; 0.208 | YES, 12 | February (4.79)   | December (-8.43)  | 13.22 |
| Female ginseng          | tau = -0.84; ***   | -3.70; ***  | NO, -   | -                 | -                 | -     |
| Fennel                  | tau = 0.96; ***    | 4.87; ***   | YES, 12 | January (4.54)    | June (-4.25)      | 8.79  |
| Fenugreek               | tau = 0.89; ***    | 4.81; ***   | YES, 12 | February (2.71)   | December (-3.33)  | 6.04  |
| Field horsetail         | tau = 0.70; ***    | 2.23; ***   | YES, 12 | May (14.76)       | December (-17.49) | 32.26 |
| Fish oil                | tau = 0.54; ***    | 1.01; ***   | YES, 12 | January (8.27)    | December (-7.41)  | 15.68 |
| Five-flavor berry       | tau = -0.36; ***   | -0.69; ***  | YES, 12 | April (5.08)      | December (-6.42)  | 11.50 |
| Flavonoid               | tau = -0.88; ***   | -3.05; ***  | YES, 12 | March (3.86)      | December (-3.71)  | 7.57  |
| Flax seed               | tau = 0.24; ***    | 0.50; **    | YES, 12 | February (7.51)   | December (-14.29) | 21.80 |
| Folate                  | tau = 0.55; ***    | 1.95; ***   | YES, 12 | March (2.56)      | December (-9.16)  | 11.72 |
| Fructooligosaccharide   | tau = -0.05; 0.385 | -           | YES, 12 | March (5.50)      | December (-9.51)  | 15.01 |
| gamma-Aminobutyric acid | tau = -0.14; 0.012 | -0.67; ***  | YES, 12 | April (5.38)      | December (-6.56)  | 11.95 |
| gamma-Linolenic acid    | tau = -0.63; ***   | -2.13; ***  | NO, -   | -                 | -                 | -     |
| Garcinia cambogia       | tau = 0.31; ***    | 2.38; ***   | YES, 12 | April (3.53)      | December (-4.22)  | 7.74  |
| Garlic                  | tau = 0.90; ***    | 5.07; ***   | YES, 12 | April (2.99)      | June (-3.20)      | 6.19  |
| Ginger                  | tau = 0.89; ***    | 4.93; ***   | YES, 12 | January (9.38)    | June (-5.86)      | 15.23 |
| Glucosamine             | tau = -0.46; ***   | -2.24; ***  | YES, 12 | April (2.19)      | December (-7.39)  | 9.58  |
| Glutamic acid           | tau = -0.69; ***   | -1.57; ***  | YES, 12 | May (4.99)        | August (-6.27)    | 11.26 |
| Glutamine               | tau = 0.61; ***    | 2.08; ***   | YES, 12 | April (4.52)      | December (-12.07) | 16.59 |
| Glutathione             | tau = 0.72; ***    | 2.88; ***   | YES, 12 | June (3.75)       | December (-6.67)  | 10.43 |
| Glycine                 | tau = 0.83; ***    | 3.32; ***   | YES, 12 | March (5.61)      | July (-7.93)      | 13.53 |
| Goji                    | tau = 0.41; ***    | 1.73; ***   | YES, 12 | March (6.00)      | December (-5.25)  | 11.26 |
| Goldenseal              | tau = -0.84; ***   | -2.28; ***  | YES, 12 | October (2.66)    | June (-4.11)      | 6.76  |
| Grape seed extract      | tau = -0.81; ***   | -2.39; ***  | YES, 12 | May (2.63)-       | November (-3.36)  | 5.99  |
| Green coffee            | tau = 0.54; ***    | 1.02; ***   | NO, -   | -                 | -                 | -     |
| Green tea               | tau = 0.70; ***    | 2.54; ***   | YES, 12 | January (10.20)   | December (-9.11)  | 19.31 |
| Guarana                 | tau = -0.71; ***   | -1.69; ***  | YES, 12 | April (6.03)      | December (-12.44) | 18.47 |
| Hawthorn                | tau = 0.37; ***    | 0.67; ***   | YES, 12 | October (7.78)    | July (-6.41)      | 14.19 |
| Hen-of-the-wood         | tau = 0.32; ***    | 0.60; **    | YES, 12 | October (23.29)   | December (-6.48)  | 29.77 |
| Hesperidin              | tau = 0.69; ***    | 3.11; ***   | YES, 12 | July (2.09)       | December (-3.46)  | 5.54  |
| Histidine               | tau = -0.58; ***   | -1.49; ***  | YES, 12 | October (10.20)   | July (-12.41)     | 22.61 |
| Holy Basil              | tau = 0.77; ***    | 3.88; ***   | YES, 12 | September (5.46)  | May (-5.46)       | 10.92 |
| Hops                    | tau = 0.31; ***    | 0.48; **    | YES, 12 | September (13.28) | December (-12.55) | 25.84 |

|                       |                    |            |         |                 |                   |       |
|-----------------------|--------------------|------------|---------|-----------------|-------------------|-------|
| Hyaluronic acid       | tau = 0.72; ***    | 2.74; ***  | YES, 12 | March (4.44)    | December (-5.58)  | 10.02 |
| Indian frankincense   | tau = 0.65; ***    | 1.99; ***  | NO, -   | -               | -                 | -     |
| Indian gooseberry     | tau = 0.89; ***    | 4.25; ***  | YES, 12 | November (5.64) | May (-6.28)       | 11.92 |
| Inositol              | tau = 0.06; 0.242  | -          | NO, -   | -               | -                 | -     |
| Iodine                | tau = 0.53; ***    | 0.39; ***  | YES, 12 | March (5.93)    | December (-3.92)  | 9.84  |
| Iron                  | tau = 0.93; ***    | 2.45; ***  | YES, 12 | March (3.83)    | December (-9.04)  | 12.88 |
| Isoleucine            | tau = -0.07; 0.205 | -          | YES, 12 | October (6.96)  | December (-8.64)  | 15.60 |
| Kelp                  | tau = -0.55; ***   | -0.84; *** | YES, 12 | March (6.15)    | December (-7.61)  | 13.76 |
| Lactase               | tau = 0.48; ***    | 1.42; ***  | YES, 12 | October (7.85)  | July (-8.27)      | 16.12 |
| Lecithin              | tau = -0.88; ***   | -2.18; *** | YES, 12 | January (3.15)  | December (-6.00)  | 9.16  |
| Lemon balm            | tau = 0.93; ***    | 3.66; ***  | YES, 12 | May (12.19)     | December (-10.68) | 22.87 |
| Leucine               | tau = 0.36; ***    | 0.57; ***  | YES, 12 | October (4.00)  | July (-6.37)      | 10.38 |
| Lingzhi mushroom      | tau = 0.39; ***    | 0.91; ***  | YES, 12 | February (2.34) | December (-4.14)  | 6.48  |
| Linoleic acid         | tau = -0.85; ***   | -3.01; *** | YES, 12 | April (7.10)    | December (-7.77)  | 14.86 |
| Linseed oil           | tau = -0.48; ***   | -1.64; *** | YES, 12 | January (7.77)  | December (-8.02)  | 15.79 |
| Lipase                | tau = 0.10; 0.067  | -          | YES, 12 | April (6.69)    | August (-9.78)    | 16.47 |
| Lipoic acid           | tau = 0.00; 0.989  | -          | YES, 12 | February (5.02) | December (-2.13)  | 7.15  |
| Liquorice             | tau = 0.78; ***    | 2.82; ***  | YES, 12 | January (4.64)  | August (-3.03)    | 7.67  |
| Lutein                | tau = -0.04; 0.486 | -          | YES, 12 | March (3.99)    | December (-5.97)  | 9.96  |
| Lycopene              | tau = -0.53; ***   | -1.81; *** | YES, 12 | August (3.19)   | December (-4.04)  | 7.23  |
| Lysine                | tau = 0.28; ***    | 0.36; ***  | YES, 12 | February (3.72) | July (-3.09)      | 6.81  |
| Maca                  | tau = 0.73; ***    | 3.12; ***  | YES, 12 | February (2.65) | December (-8.17)  | 10.83 |
| Magnesium             | tau = 0.94; ***    | 4.60; ***  | YES, 12 | March (2.56)    | December (-5.22)  | 7.78  |
| Maidenhair tree       | tau = -0.54; ***   | -1.99; *** | YES, 12 | November (8.33) | December (-4.62)  | 12.95 |
| Manganese             | tau = -0.45; ***   | -1.34; *** | YES, 12 | March (5.58)    | December (-8.03)  | 13.61 |
| Mangosteen            | tau = -0.26; ***   | -1.31; *** | YES, 12 | July (6.45)     | December (-8.63)  | 15.09 |
| Marsh mallow          | tau = 0.85; ***    | 4.43; ***  | YES, 12 | January (12.26) | July (-11.88)     | 24.14 |
| Melatonin             | tau = 0.82; ***    | 2.97; ***  | YES, 12 | January (5.96)  | December (-4.47)  | 10.44 |
| Methionine            | tau = -0.68; ***   | -1.63; *** | YES, 12 | March (4.22)    | December (-6.41)  | 10.64 |
| Methylsulfonylmethane | tau = -0.63; ***   | -3.60; *** | YES, 12 | February (1.89) | December (-4.96)  | 6.85  |
| Milk thistle          | tau = 0.68; ***    | 2.04; ***  | YES, 12 | January (6.79)  | December (-6.34)  | 13.13 |
| Milkvetch             | tau = -0.62; ***   | -2.04; *** | YES, 12 | November (4.06) | July (-4.75)      | 8.82  |
| Molybdenum            | tau = -0.75; ***   | -2.40; *** | YES, 12 | April (4.68)    | July (-5.84)      | 10.51 |
| Monounsaturated fat   | tau = -0.27; ***   | -0.33; **  | YES, 12 | February (5.65) | December (-8.00)  | 13.65 |

|                     |                   |             |         |                  |                   |       |
|---------------------|-------------------|-------------|---------|------------------|-------------------|-------|
| Niacin              | tau = -0.61; ***  | -1.14; ***  | YES, 12 | April (4.71)     | December (-7.20)  | 11.91 |
| Nickel              | tau = 0.10; 0.058 | -           | YES, 12 | May (7.19)       | December (-6.81)  | 13.99 |
| Oat                 | tau = 0.94; ***   | 4.94; ***   | YES, 12 | February (3.31)  | December (-9.56)  | 12.87 |
| Oleic acid          | tau = -0.75; ***  | -2.31; ***  | YES, 12 | May (7.31)       | August (-10.51)   | 17.83 |
| Olive               | tau = 0.9; ***    | 4.50; ***   | YES, 12 | February (4.46)  | December (-3.34)  | 7.80  |
| Omega-3 fatty acids | tau = 0.36; ***   | 1.12; ***   | YES, 12 | March (6.30)     | December (-10.50) | 16.79 |
| Omega-6 fatty acid  | tau = -0.63; ***  | -1.33; ***  | YES, 12 | March (8.49)     | December (-13.77) | 22.26 |
| Omega-9 fatty acid  | tau = -0.55; ***  | -1.37; ***  | YES, 12 | April (3.42)     | December (-7.90)  | 11.32 |
| Oregano             | tau = 0.82; ***   | 3.75; ***   | YES, 12 | January (6.70)   | August (-4.06)    | 10.76 |
| Pantothenic acid    | tau = -0.50; ***  | -1.23; ***  | YES, 12 | April (5.95)     | December (-8.76)  | 14.71 |
| Papain              | tau = -0.57; ***  | -2.34; ***  | YES, 12 | March (3.68)     | December (-6.43)  | 10.12 |
| Papaya              | tau = 0.84; ***   | 5.21; ***   | YES, 12 | March (3.37)     | December (-7.41)  | 10.77 |
| Parsley             | tau = 0.89; ***   | 5.40; ***   | YES, 12 | March (5.70)     | December (-7.12)  | 12.82 |
| Passion fruit       | tau = 0.51; ***   | 2.96; ***   | NO, -   | -                | -                 | -     |
| Pectin              | tau = 0.30; ***   | 0.40; 0.011 | YES, 12 | May (3.69)       | December (-4.66)  | 8.36  |
| Peppermint          | tau = 0.83; ***   | 4.29; ***   | YES, 12 | January (2.95)   | August (-2.13)    | 5.08  |
| Phenylalanine       | tau = -0.87; ***  | -3.33; ***  | YES, 12 | May (4.04)       | December (-9.62)  | 13.66 |
| Phosphatidylcholine | tau = -0.85; ***  | -3.11; ***  | YES, 12 | April (5.75)     | December (-7.97)  | 13.72 |
| Phosphatidylserine  | tau = -0.80; ***  | -2.15; ***  | YES, 12 | September (1.56) | December (-4.56)  | 6.12  |
| Phosphorus          | tau = -0.26; ***  | -0.81; ***  | YES, 12 | October (6.91)   | December (-8.72)  | 15.62 |
| Polyunsaturated fat | tau = -0.5; ***   | -1.21; ***  | YES, 12 | October (10.69)  | July (-12.13)     | 22.81 |
| Pomegranate         | tau = 0.89; ***   | 3.27; ***   | YES, 12 | November (25.38) | June (-12.43)     | 37.80 |
| Potassium           | tau = 0.69; ***   | 1.45; ***   | YES, 12 | March (5.47)     | December (-10.44) | 15.90 |
| Prebiotic           | tau = 0.77; ***   | 2.74; ***   | YES, 12 | May (4.37)       | December (-6.70)  | 11.07 |
| Probiotic           | tau = 0.98; ***   | 5.07; ***   | YES, 12 | January (3.87)   | December (-4.59)  | 8.46  |
| Proline             | tau = -0.48; ***  | -1.36; ***  | YES, 12 | October (5.68)   | July (-6.74)      | 12.42 |
| Protease            | tau = -0.94; ***  | -3.44; ***  | YES, 12 | November (4.98)  | August (-7.92)    | 12.90 |
| Protein             | tau = 0.68; ***   | 1.78; ***   | YES, 12 | April (6.77)     | December (-14.23) | 21.00 |
| Quercetin           | tau = -0.28; ***  | -0.89; ***  | YES, 12 | April (8.89)     | December (-7.19)  | 16.09 |
| Raspberry           | tau = 0.42; ***   | 1.40; ***   | YES, 12 | February (4.50)  | December (-6.35)  | 10.85 |
| Red Clover          | tau = -0.59; ***  | -1.04; ***  | YES, 12 | May (3.82)       | December (-7.86)  | 11.68 |
| Red raspberry       | tau = 0.86; ***   | 3.75; ***   | YES, 12 | July (17.83)     | December (-9.73)  | 27.56 |
| Resveratrol         | tau = 0.20; ***   | 0.70; ***   | NO, -   | -                | -                 | -     |
| Rhodiola rosea      | tau = 0.40; ***   | 0.86; ***   | YES, 12 | February (4.20)  | December (-10.91) | 15.11 |

|                      |                    |              |         |                  |                   |       |
|----------------------|--------------------|--------------|---------|------------------|-------------------|-------|
| Riboflavin           | tau = -0.04; 0.477 | -            | YES, 12 | November (7.71)  | December (-9.46)  | 17.17 |
| Rose hip             | tau = 0.76; ***    | 2.79; ***    | YES, 12 | October (11.96)  | June (-10.68)     | 22.64 |
| Rosemary             | tau = 0.90; ***    | 4.12; ***    | YES, 12 | May (5.62)       | December (-5.76)  | 11.38 |
| Rutin                | tau = -0.42; ***   | -1.48; ***   | NO, -   | -                | -                 | -     |
| Saturated fat        | tau = 0.48; ***    | 0.94; ***    | YES, 12 | October (11.00)  | July (-16.06)     | 27.07 |
| Saw palmetto extract | tau = -0.76; ***   | -2.63; ***   | YES, 12 | February (3.19)  | May (-2.27)       | 5.46  |
| Selenium             | tau = 0.42; ***    | 1.02; ***    | YES, 12 | March (4.70)     | December (-8.62)  | 13.32 |
| Siberian Ginseng     | tau = -0.89; ***   | -2.43; ***   | YES, 12 | October (5.10)   | December (-4.46)  | 9.56  |
| Silicon              | tau = 0.05; 0.392  | -            | YES, 12 | April (3.71)     | December (-6.61)  | 10.32 |
| Slippery elm         | tau = 0.27; ***    | 0.39; **     | YES, 12 | January (5.78)   | December (-4.28)  | 10.05 |
| Spirulina            | tau = 0.61; ***    | 2.54; ***    | YES, 12 | March (4.49)     | December (-10.37) | 14.86 |
| β-Alanine            | tau = 0.73; ***    | 4.05; ***    | YES, 12 | January (5.83)   | December (-6.45)  | 12.28 |
| Stevia               | tau = 0.52; ***    | 2.90; ***    | YES, 12 | May (4.85)       | December (-13.73) | 18.59 |
| Sucrase              | tau = -0.37; ***   | -1.53; ***   | YES, 12 | October (13.79)  | August (-16.60)   | 30.39 |
| Synbiotics           | tau = 0.12; 0.024  | 0.92; ***    | YES, 12 | February (5.16)  | July (-3.32)      | 8.47  |
| Taurine              | tau = 0.13; 0.02   | 0.16; 0.157  | YES, 12 | April (4.66)     | December (-10.44) | 15.09 |
| Theanine             | tau = 0.82; ***    | 3.55; ***    | YES, 12 | September (2.34) | December (-6.48)  | 8.82  |
| Thiamine             | tau = 0.85; ***    | 2.44; ***    | YES, 12 | April (3.77)     | December (-8.17)  | 11.94 |
| Threonine            | tau = -0.29; ***   | -1.40; ***   | YES, 12 | October (7.90)   | December (-9.06)  | 16.96 |
| Tryptophan           | tau = -0.33; ***   | -0.58; ***   | YES, 12 | November (29.91) | July (-5.80)      | 35.71 |
| Turmeric             | tau = 0.89; ***    | 5.12; ***    | YES, 12 | January (4.68)   | June (-2.20)      | 6.89  |
| Tyrosine             | tau = -0.57; ***   | -1.32; ***   | YES, 12 | May (5.71)       | December (-8.33)  | 14.04 |
| Valerian             | tau = 0.64; ***    | 0.88; ***    | YES, 12 | July (2.92)      | December (-2.67)  | 5.60  |
| Valine               | tau = -0.17; **    | -0.26; 0.065 | YES, 12 | October (7.62)   | July (-10.17)     | 17.79 |
| Vanadium             | tau = -0.64; ***   | -1.92; ***   | YES, 12 | October (2.24)   | December (-2.78)  | 5.02  |
| Velvet bean          | tau = 0.65; ***    | 2.43; ***    | YES, 12 | March (2.66)     | December (-4.44)  | 7.09  |
| Vitamin A            | tau = -0.17; **    | -0.45; ***   | YES, 12 | November (8.63)  | July (-11.64)     | 20.26 |
| Vitamin B-6          | tau = 0.9; ***     | 3.01; ***    | YES, 12 | March (3.88)     | December (-7.24)  | 11.13 |
| Vitamin C            | tau = 0.68; ***    | 2.43; ***    | YES, 12 | October (4.92)   | July (-7.57)      | 12.49 |
| Vitamin D            | tau = 0.97; ***    | 4.86; ***    | YES, 12 | February (6.68)  | July (-6.34)      | 13.01 |
| Vitamin E            | tau = 0.45; ***    | 0.49; ***    | YES, 12 | November (4.93)  | July (-3.05)      | 7.98  |
| Vitamin K            | tau = 0.68; ***    | 1.37; ***    | YES, 12 | April (5.22)     | December (-9.10)  | 14.33 |
| Vitamin K2           | tau = 0.92; ***    | 6.11; ***    | YES, 12 | February (4.00)  | August (-2.52)    | 6.51  |
| Whey protein         | tau = 0.76; ***    | 4.44; ***    | YES, 12 | January (4.82)   | December (-13.81) | 18.63 |

|            |                  |             |         |                  |                  |       |
|------------|------------------|-------------|---------|------------------|------------------|-------|
| Yohimbe    | tau = -0.85; *** | -3.43; ***  | NO, -   | -                | -                | -     |
| Zeaxanthin | tau = 0.2; ***   | 0.42; 0.024 | YES, 12 | September (3.74) | December (-7.08) | 10.82 |
| Zinc       | tau = 0.67; ***  | 2.39; ***   | YES, 12 | February (3.17)  | December (-4.38) | 7.56  |



Dataset
